# Supplementary material for: Redefining Surgical Materials: Applications of Silk Fibroin in Osteofixation and Fracture Repair
Source: MDPI journal article supplement (doi:10.3390/biomimetics9050286), 2024-05-11
Supplement: s1 [file s1]

**Table S1:** Study Characteristic Summary

| <b>Title</b>                                                                                                                                                                 | <b>First Author, Year</b> | <b>Type of Study</b> | <b>Intervention/ Device</b>          | <b>Model Organism</b>                                                                  | <b>Medical Specialty Affiliation</b>               |
|------------------------------------------------------------------------------------------------------------------------------------------------------------------------------|---------------------------|----------------------|--------------------------------------|----------------------------------------------------------------------------------------|----------------------------------------------------|
| The Use of Silk-Based Devices for Fracture Fixation                                                                                                                          | Perrone, 2014             | In Vivo              | Silk Fibroin Screws                  | Sprague- Dawley Rats                                                                   | Plastic and Reconstructive Surgery, Otolaryngology |
| Silk Electro Gel Coatings for Titanium Dental Implants                                                                                                                       | Elia, 2014                | In Vitro             | Silk Fibroin Dental Coatings         | Titanium Screws and Studs                                                              | Basic Science                                      |
| 3D Printing of Silk Microparticle Reinforced Polycaprolactone (PCL) Scaffolds for Tissue Engineering Applications                                                            | Vyas, 2022                | In Vitro             | Composite Silk Fibroin-PCL Scaffolds | Human Adipose-Derived Mesenchymal Cells                                                | Basic Science                                      |
| Increased Osteoid Formation in BMP-2-Loaded Silk-Based Screw                                                                                                                 | Koolen, 2016              | In Vivo              | Silk Fibroin Screws                  | Sprague- Dawley Rats                                                                   | Plastic and Reconstructive Surgery                 |
| An Antibacterial and Absorbable Silk-Based Fixation Material with Impressive Mechanical Properties and Biocompatibility                                                      | Shi, 2016                 | In Vitro             | Silk Fibroin Screws                  | Gram positive staphylococcus aureus and Gram negative Escherichia coli (E. coli) cells | Orthopedic Surgery                                 |
| Controllable Production of Natural Silk Nanofibrils for Reinforcing Silk-Based Orthopedic Screws                                                                             | Yan, 2023                 | In Vitro             | Silk Fibroin Screws                  | Human Bone Marrow Mesenchymal Stem Cells                                               | Orthopedic Surgery                                 |
| Degradation of Internal Fixation Materials Based on Antibacterial and Absorbable Silk Containing Different Gentamicin Concentrations                                         | Shi, 2022                 | In Vivo              | Silk Fibroin Screws                  | New Zealand Rabbits                                                                    | Basic Science                                      |
| Vancomycin- Nanofunctionalized Peptide-Enriched Silk Fibroin to Prevent Methicillin-Resistant Staphylococcus epidermidis-Induced Femoral Nonunions in Rats                   | Bottagisio, 2022          | In Vivo              | Silk Fibroin Sponges                 | Wistar Rats                                                                            | Orthopedic Surgery                                 |
| Silk Biomaterials-Mediated miRNA Functionalized Orthopedic Devices                                                                                                           | James, 2019               | In Vitro             | Silk Fibroin Screws, Plates and Silk | Human Umbilical Vein Endothelial Cells, Human Mesenchymal Stem Cells                   | Basic Science                                      |
| Development of Bone Screw Using Novel Biodegradable Composite Orthopedic Biomaterial: from Material Design to In Vitro Biomechanical and In Vivo Biocompatibility Evaluation | Suryavanshi, 2019         | In Vivo              | Silk Fibroin Screws                  | Sprague-Dawley Rats                                                                    | Basic Science                                      |
| Robust Bioactive Protein-Based Screws with Dual Crosslinked Network for Internal Bone Fixation                                                                               | Zhang, 2022               | In Vivo              | Silk Fibroin Screws                  | Sprague- Dawley Rats                                                                   | Orthopedic Surgery                                 |
| Cellulose Nanocrystal Reinforced Silk Fibroin Coating for Enhanced Corrosion Protection and Biocompatibility of Mg-Based Alloys for Orthopedic Implant Applications          | Asadi, 2021               | In Vitro             | Silk Fibroin Alloy Sheets            | Fetal Osteoblast Cells                                                                 | Basic Science                                      |

|                                                                                                                                                                          |            |          |                              |                      |                                |
|--------------------------------------------------------------------------------------------------------------------------------------------------------------------------|------------|----------|------------------------------|----------------------|--------------------------------|
| Electrodeposited Silk Coatings for Bone Implants                                                                                                                         | Elia, 2014 | In Vitro | Silk Fibroin Dental Implants | Titanium Studs       | Oral and Maxillofacial Surgery |
| New Concept of 3D Printed Bone Clip (Polylactic acid/Hydroxyapatite/Silk composite) for Internal Fixation of Bone Fractures                                              | Yeon, 2017 | In Vivo  | Silk Fibroin Bone Clip       | Sprague- Dawley Rats | Otolaryngology                 |
| An Interference Screw Made Using a Silk Fibroin-Based Bulk Material with High Content of Hydroxyapatite for Anterior Cruciate Ligament Reconstruction in a Rabbit Model. | Yan, 2021  | In Vivo  | Silk Fibroin Screws          | New Zealand Rabbits  | Sports Medicine                |

**Table S2:** *In Vitro* study results

| Study       | Protocol                                                                                                                                                                                                                                                                                                                                                                                                | Outcomes                                                                                                                                                                                                                                                                                                                                                  | NIH Quality Assessment |
|-------------|---------------------------------------------------------------------------------------------------------------------------------------------------------------------------------------------------------------------------------------------------------------------------------------------------------------------------------------------------------------------------------------------------------|-----------------------------------------------------------------------------------------------------------------------------------------------------------------------------------------------------------------------------------------------------------------------------------------------------------------------------------------------------------|------------------------|
| Elia, 2014  | In the first technique, silk was electrodeposited directly onto titanium substrates, while the second technique utilized melted electrogels dispensed onto titanium to form coatings. Both techniques were evaluated for coating uniformity using stylus profilometer and dial thickness gauge. Mechanical strength of coated titanium studs was assessed using a universal mechanical testing machine. | The silk fibroin coatings for titanium implants demonstrated adequate adhesion and mechanical strength, highlighting the potential for functionalizing dental implants.                                                                                                                                                                                   | Low Risk of Bias       |
| Vyas, 2022  | PCL/SMP composites were prepared via melt blending, utilized for scaffold fabrication using extrusion-based additive manufacturing, and assessed for in vitro biological compatibility using human adipose-derived stem cells maintained in MesenPRO RS™ media under standard conditions.                                                                                                               | Silk microparticles enhanced the polycaprolactone (PCL) scaffolds by improving mechanical properties and biocompatibility, offering promise for bone tissue engineering.                                                                                                                                                                                  | Low Risk of Bias       |
| Shi, 2016   | Silk screw blank molds were prepared using wax, filled with HFIP silk solution, subjected to methanol and water gradients, immersed in distilled water, dried, and baked, with resulting silk blanks cut into slices and screws; additionally, various concentrations of silk-based screws were prepared, including pure silk-based screws and those with different concentrations of GSS.              | Silk screws loaded with gentamicin demonstrated antimicrobial properties that could reduce postoperative infections.                                                                                                                                                                                                                                      | Low Risk of Bias       |
| Yan, 2023   | Dialyzed SNF hydrogels were dried to obtain silk rods, which were then processed into silk screws and characterized, with varying concentrations of SNFs represented accordingly; additionally, commercial human bone mesenchymal stem cells isolated from a healthy individual were utilized for cell culture experiments.                                                                             | Silk screws fabricated with silk nanofibrils demonstrated enhanced stiffness and biocompatibility suggesting their potential for orthopedic applications.                                                                                                                                                                                                 | Low Risk of Bias       |
| James, 2019 | AS-miR-214 silk devices, prepared using surface coating, were used in various tests to examine in vitro biocompatibility and inhibition of osteoinductive antagonists.                                                                                                                                                                                                                                  | Incorporating miRNAs onto silk-based screws led to a smooth, uniform coating and a burst release profile followed by sustained release over 7 days, with no apparent adverse effects, significantly augmenting osteogenic differentiation markers and mineralization, indicating good cytocompatibility and suggesting a feasible approach for developing | Low Risk of Bias       |

|             |                                                                                                                                                                                                                                                                                                                                                                                                                                                                                                                                                                                                        |                                                                                                                                                                                                                                                                                                                                                                               |                       |
|-------------|--------------------------------------------------------------------------------------------------------------------------------------------------------------------------------------------------------------------------------------------------------------------------------------------------------------------------------------------------------------------------------------------------------------------------------------------------------------------------------------------------------------------------------------------------------------------------------------------------------|-------------------------------------------------------------------------------------------------------------------------------------------------------------------------------------------------------------------------------------------------------------------------------------------------------------------------------------------------------------------------------|-----------------------|
|             |                                                                                                                                                                                                                                                                                                                                                                                                                                                                                                                                                                                                        | silk-based devices to promote enhanced osteogenesis.                                                                                                                                                                                                                                                                                                                          |                       |
| Asadi, 2021 | Electrochemical and in vitro corrosion studies were conducted in Hank's solution to simulate physiological conditions, employing electrochemical techniques such as open circuit potential (OCP), potentiodynamic polarization (PP), and electrochemical impedance spectroscopy (EIS), with subsequent morphological analysis by SEM. Cytocompatibility assessments involved cell culture with fetal osteoblast cells to evaluate cell viability and adhesion using cell viability assays and fluorescence microscopy to observe cell morphology and adhesion on the samples.                          | Composite silk fibroin and cellulose nanocrystal coating for magnesium alloys enhanced corrosion resistance and biocompatibility, which could improve the performance of orthopedic implants made from these materials.                                                                                                                                                       | Moderate Risk of Bias |
| Elia, 2014  | An aqueous silk fibroin solution was electrogelled onto titanium studs using a platinum wire or titanium stud, followed by characterization of the titanium stud surface using stylus profilometry and SEM, and mechanical analysis through uniaxial tensile and shear tests. Additionally, hydroxyapatite and glycerol were incorporated into the silk solution prior to electrogelation, and water and methanol annealing were performed before mechanical testing, with gel deposition quantified and compound incorporation and release assessed using fluorescein isothiocyanate-dextran samples. | The adhesion strength of silk protein-based electrodeposited coatings for dental implants was influenced by concentration and surface texture, with higher concentrations exhibiting increased strength comparable to clinically relevant coatings, while also serving as reservoirs for storing and releasing model compounds with consistency akin to conventional systems. | Low Risk of Bias      |

**Table S3:** *In Vivo* study results

| Study         | Protocol                                                                                                                                                                                                                                                                                                                                            | Outcomes                                                                                                                                                                                                                                                                                                                                                                    | NIH Quality Assessment |
|---------------|-----------------------------------------------------------------------------------------------------------------------------------------------------------------------------------------------------------------------------------------------------------------------------------------------------------------------------------------------------|-----------------------------------------------------------------------------------------------------------------------------------------------------------------------------------------------------------------------------------------------------------------------------------------------------------------------------------------------------------------------------|------------------------|
| Perrone, 2014 | Silk screws were implanted identically to current metallic fixation procedures where a pilot hole is drilled and a self-tapping screw inserted.                                                                                                                                                                                                     | Demonstrated the biocompatibility and functionality of silk fibroin screws in a rat model showing successful implantation without failures, typical bone remodeling processes, and early resorption without adverse reactions, suggesting the feasibility of using these self-tapping screws as a single-step alternative to current resorbable screw implantation methods. | Low Risk of Bias       |
| Koolen, 2016  | Silk pins, machined to specific dimensions, were loaded with BMP-2 by immersion in a solution, followed by in vitro assessment of BMP-2 release in PBS over various time intervals, while in vivo experiments involved implanting BMP-2-loaded silk screws alongside control screws in rats to evaluate the effects over 1, 3, and 6-month periods. | BMP-2 loaded silk screws demonstrated enhanced bone regeneration properties with increased collagen deposition and osteoclast/osteoblast activity compared to pure silk screws in a rat model, indicating their potential efficacy for promoting bone healing over a 6-month period.                                                                                        | Low Risk of Bias       |

|                   |                                                                                                                                                                                                                                                                                                                                                                                                                                                                                                                                                                                                                                                                                 |                                                                                                                                                                                                                                                                                                                                                                                                                      |                       |
|-------------------|---------------------------------------------------------------------------------------------------------------------------------------------------------------------------------------------------------------------------------------------------------------------------------------------------------------------------------------------------------------------------------------------------------------------------------------------------------------------------------------------------------------------------------------------------------------------------------------------------------------------------------------------------------------------------------|----------------------------------------------------------------------------------------------------------------------------------------------------------------------------------------------------------------------------------------------------------------------------------------------------------------------------------------------------------------------------------------------------------------------|-----------------------|
| Shi, 2022         | Gentamicin-loaded silk-based materials, with varying concentrations of gentamicin loaded into each screw, were prepared using a previously reported method, resulting in rods that were further processed into screws for antibacterial evaluation.                                                                                                                                                                                                                                                                                                                                                                                                                             | Gentamicin-loaded silk-based screws with 4mg/g of gentamicin were securely affixed in rabbit femurs, displaying rough surfaces and close contact with bone cortex, with histological analysis revealing multinucleated macrophages and new bone formation, alongside favorable biocompatibility and clinical potential over a 3-month period.                                                                        | Low Risk of Bias      |
| Bottagisio, 2022  | After surgically inducing femur osteotomy in rats under general anesthesia, femoral defects were inoculated with saline or MRSE strain, then PSF or AFN-PSF sponges were inserted into the fracture site, with perioperative care, euthanasia after eight weeks, and subsequent micro-CT scans, histological analyses, and microbiological tests to assess bone healing and infection; micro-CT images were obtained to measure bony bridging and bone volume, while microbiological tests were conducted to evaluate bacterial colonization in explanted femurs, followed by histological staining for morphology, inflammation, fracture healing, and signs of osteomyelitis. | Vancomycin-enriched silk fibroin sponges (AFN-PSF) effectively combated MRSE infection, leading to nearly complete fracture healing, new bone formation, and reduced inflammation compared to pure silk fibroin sponges (PSF) in a rat model of MRSE-induced nonunion, suggesting the potential of AFN-PSF for local arthroplasty prophylaxis in high-risk infection patients.                                       | Moderate Risk of Bias |
| Suryavanshi, 2019 | Composite screws were implanted in the subcutaneous pockets of SD rats to assess their biocompatibility. Blood collection, histopathology, and biomechanical testing was conducted to evaluate safety and pull-out strength. Biomechanical testing was performed on synthetic bone blocks to assess the pull-out performance of the screws according to ASTM standards, and ACL reconstruction surgeries were conducted using prototype PCL bone screws to evaluate their suitability for the intended application.                                                                                                                                                             | The MSP composite (10% MgO, 20% silk, and 70% PCL) exhibited enhanced tensile properties resembling soft tissues, demonstrating normal organ function and superior pull-out strength compared to PCL alone, suggesting its potential for orthopedic applications.                                                                                                                                                    | Low Risk of Bias      |
| Zhang, 2022       | Cylindrical hydrogels were implanted subcutaneously in rats for 2, 4, and 8 weeks, followed by histological analysis with hematoxylin and eosin staining. Additionally, a rat model of screw implantation was employed, where self-tapping screws were inserted into the femoral condyle of rats, and analyses including radiographic examination, micro-CT, MRI, toluidine blue staining, and van Gieson staining were conducted at 2–8 weeks post-operation to evaluate bone healing and screw integrity.                                                                                                                                                                     | They observed preliminary resorption and degradation of both RSF and RSF/G hydrogels, with RSF/G hydrogels showing more degradation at eight weeks, indicating good biocompatibility; both hydrogels maintained screw morphology and demonstrated sufficient strength for insertion into bone, with RSF/G screws exhibiting higher MRI signals, suggesting their potential in orthopedic bone fixation applications. | Moderate Risk of Bias |
| Yeon, 2017        | Femoral bone fractures were surgically induced in 6 Sprague-Dawley rats under general anesthesia and the osteotomy site with a PLA/HA/Silk composite bone clip was fixed, followed by evaluation of healing and alignment using CT scans after 8 weeks and sacrifice of the animals at 1, 2, and 4 weeks post-surgery, with subsequent                                                                                                                                                                                                                                                                                                                                          | The PLA/HA/Silk composite bone clip possessed superior biocompatibility and facilitated excellent alignment of bony segments across femur fracture sites compared to PLA and PLA/HA clips, offering an innovative, 3D-printed, patient-specific solution that overcomes limitations of                                                                                                                               | Low Risk of Bias      |

|           |                                                                                                                                                                                                                                                                                                                                                                                                                                                                                                                                                                                                |                                                                                                                                                                                                                                                                                                                                                                     |                  |
|-----------|------------------------------------------------------------------------------------------------------------------------------------------------------------------------------------------------------------------------------------------------------------------------------------------------------------------------------------------------------------------------------------------------------------------------------------------------------------------------------------------------------------------------------------------------------------------------------------------------|---------------------------------------------------------------------------------------------------------------------------------------------------------------------------------------------------------------------------------------------------------------------------------------------------------------------------------------------------------------------|------------------|
|           | histological analysis of the specimens through hematoxylin and eosin staining.                                                                                                                                                                                                                                                                                                                                                                                                                                                                                                                 | traditional internal fixation devices and reduces associated complications.                                                                                                                                                                                                                                                                                         |                  |
| Yan, 2021 | Forty-eight male New Zealand rabbits underwent medial parapatellar arthrotomy and dislocation of the patella to establish an anterior cruciate ligament reconstruction (ACLR) model, with autografts inserted into bone tunnels drilled into the femur and tibia, followed by insertion of silk fibroin (SF) or SF/40% hydroxyapatite (HA)-SF screws; micro-computed tomography scanning and histological analyses were conducted at 4 and 12 weeks postoperatively, and biomechanical analysis was performed to assess maximal failure load, stiffness, range of motion, and site of failure. | The SF/40% HA–SF group exhibited notably higher maximal failure load and stiffness, superior osteoinductivity, and a distinct four-layer structure of the regenerated tendon–bone interface compared to other groups, indicating promising potential for clinical translation of this composite material in rabbit anterior cruciate ligament (ACL) reconstruction. | Low Risk of Bias |
